# Supplementary material
Source: PubMed Central journal article supplement (PMC2832847)
Supplement: NIHMS165635-supplement-1.pdf [file NIHMS165635-supplement-1.pdf]

Glutamate co-release at GABA/glycinergic synapses is crucial for the refinement of an inhibitory map

Jihyun Noh, Rebecca P Seal, Jessica A. Garver, Robert H Edwards & Karl Kandler

Supplemental Figure 1

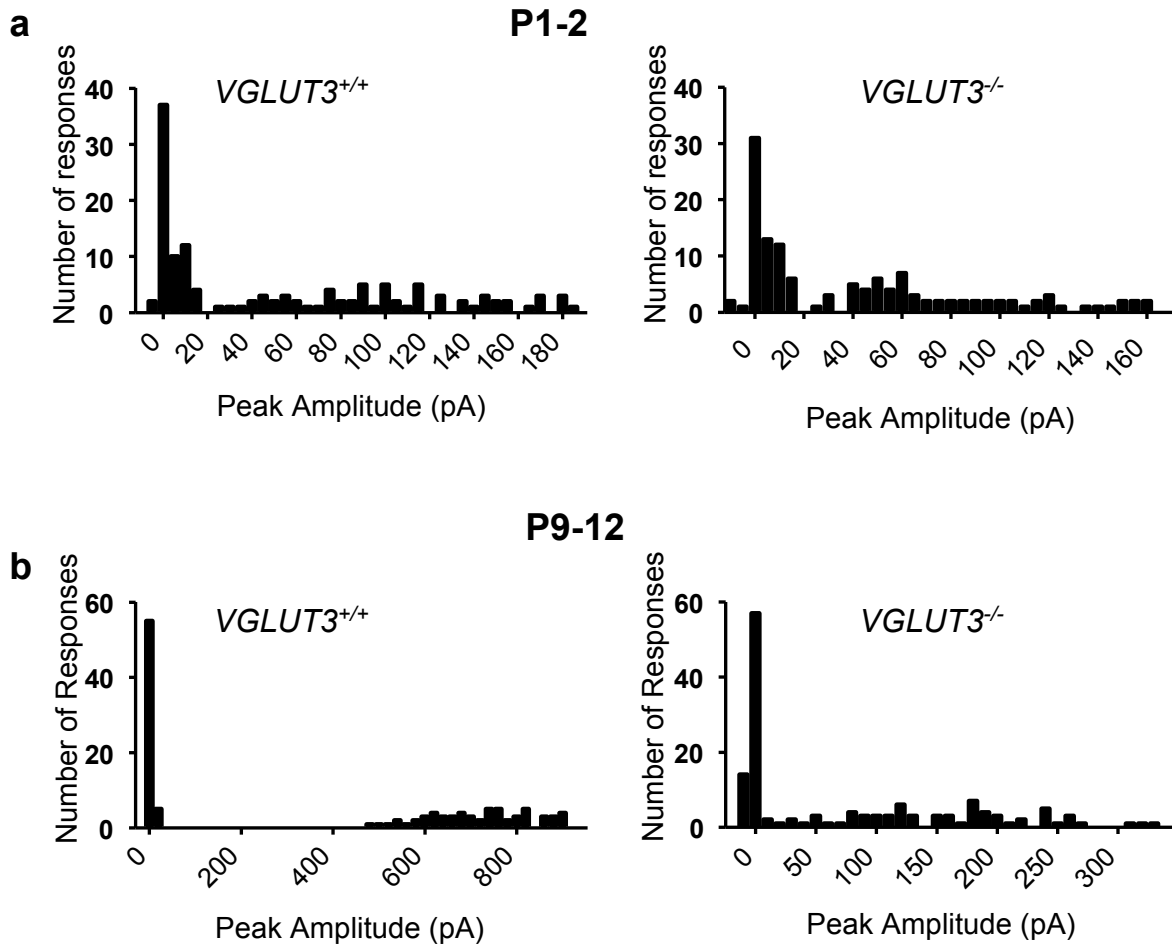

**Supplemental figure 1.**

Amplitude histograms of minimal stimulation responses. **(a)** Amplitude histogram of responses in P1-2 mice (shown in Fig 2a). **(b)** Amplitude histogram of responses at P9-12 (shown in Figure 2b).

## Supplemental Figure 2

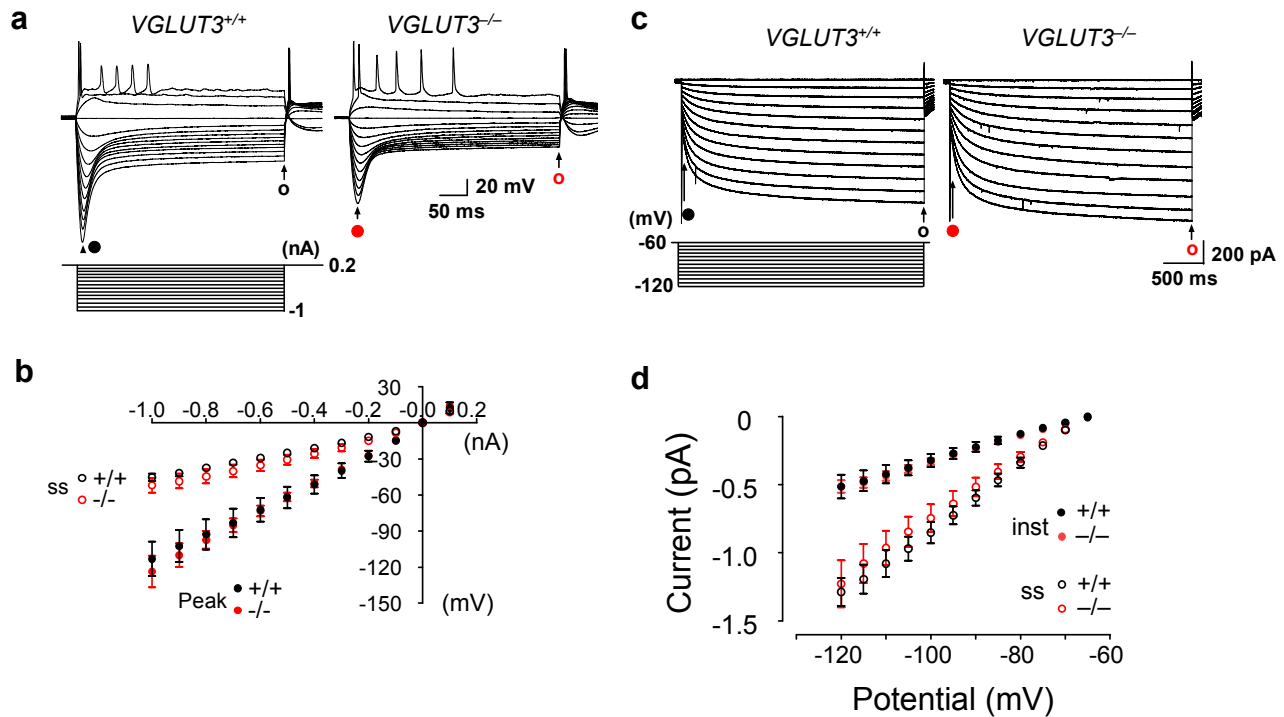

### Supplemental Figure 2

Membrane properties of LSO neurons are not different between *VGLUT3*<sup>-/-</sup> and *VGLUT3*<sup>+/+</sup> mice. (a) Membrane voltage responses of LSO neurons (P9–12) to current injections. Negative currents generated a slowly relaxing hyperpolarization 'sag', typical for LSO neurons. (b) Current-voltage relationship for LSO neurons. Inward rectification in response to hyperpolarizing current pulses was present in each case (*VGLUT3*<sup>+/+</sup>, black,  $n = 4$ ; *VGLUT3*<sup>-/-</sup>, red,  $n = 5$ ; closed circle, peak point; open circle, steady-state: *ss*). (c) LSO neurons from both *VGLUT3*<sup>+/+</sup> and *VGLUT3*<sup>-/-</sup> expressed hyperpolarizing-activated currents ( $I_h$ ).  $I_h$  was activated by 3 s, hyperpolarizing voltage steps from -120 mV to -60 mV in 5 mV increments (*inset*, voltage commands). (d) Current-voltage relationship illustrates  $I_h$  showing instantaneous currents (*inst*, closed circles) and steady state currents (*ss*, open circle; *VGLUT3*<sup>+/+</sup>, black,  $n = 4$ ; *VGLUT3*<sup>-/-</sup>, red,  $n = 5$ ). In these experiments, the internal pipette solution contained (in mM): 54 D-potassium gluconic acid, 56 KCl, 1 MgCl<sub>2</sub>, 1 CaCl<sub>2</sub>, 10 HEPES, 11 EGTA, 0.3 Na-GTP, 2 Mg-ATP, 5 QX-314 and 0.3 % biocytin (pH 7.2, 280 mOsm/l).

### Supplemental Figure 3

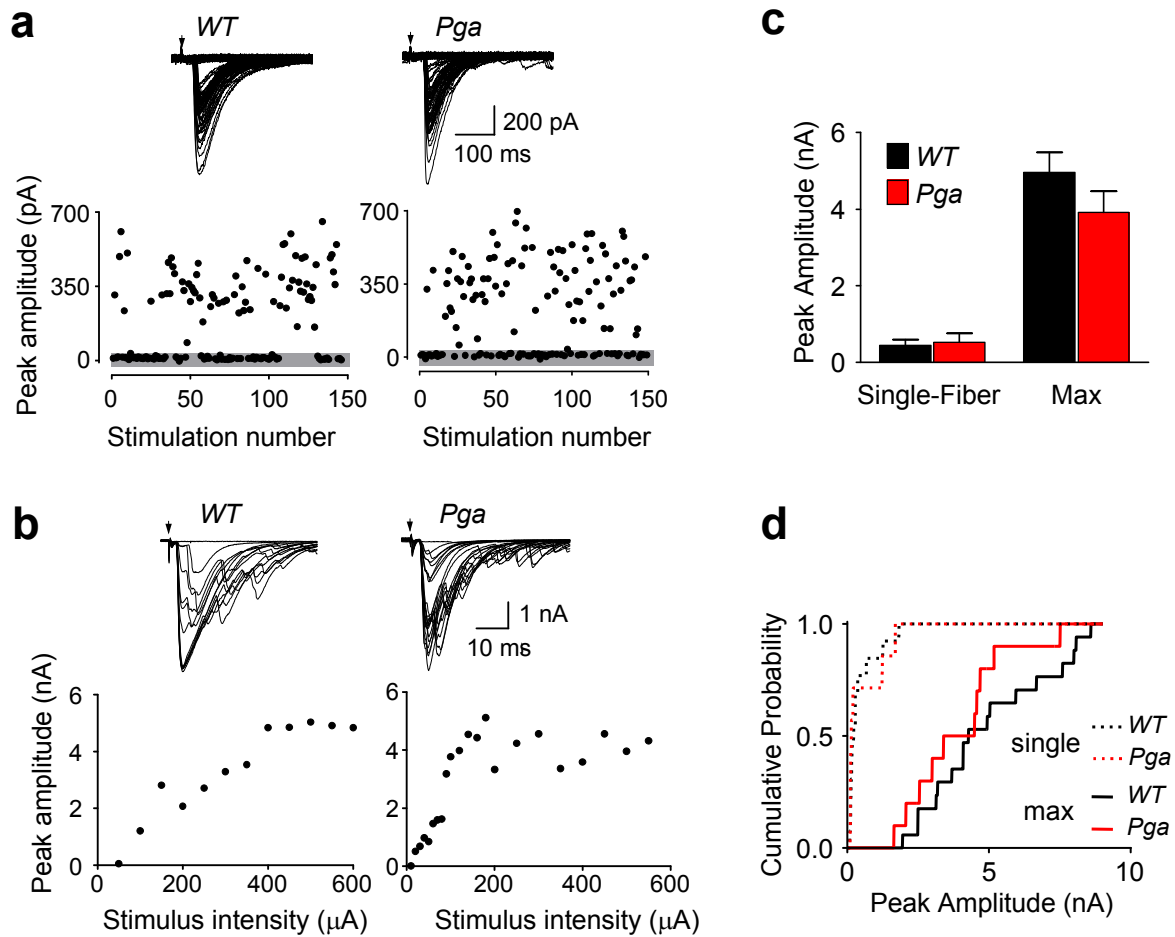

**Supplemental figure 3** Minimal and maximal stimulation of MNTB-LSO fibers in *WT* and *Pachanga* mice aged P9-12 (*Pga*, Otoferlin knockout; Schwander *et al.*, *J. Neurosci.* **27**,2163-2175, 2007). **(a)** Examples of single fiber responses. *Inset*: Superposition of 150 consecutive traces. **(b)** Examples of stimulus-response relationships. **(c)** Single-fiber and maximal synaptic current amplitudes were not significantly different between *WT* and *Pga* mice (Single-fiber response: *WT*,  $444 \pm 145$  pA,  $n = 13$ ; *Pga*,  $519 \pm 251$  pA,  $n = 7$ ;  $P > 0.7$ ; Student's t-test. Maximal response: *WT*,  $5.0 \pm 0.5$  nA,  $n = 17$ ; *Pga*,  $3.9 \pm 0.6$  nA,  $n = 10$ ;  $P > 0.2$ ; Student's t-test). **(d)** Cumulative probability histograms for single-fiber and maximal responses in *WT* and *Pga* mice (Single-fiber,  $P > 0.5$ ; Max.,  $P > 0.6$ ; Kolmogorov-Smirnov test).
